# Supplementary material
Source: Springer Nature journal article supplement (https://www.springermedizin.de/resource/supplementary/12911_2013_782_MOESM5_ESM.pdf/9526780)
Supplement: MOESM5 [file 9526780]

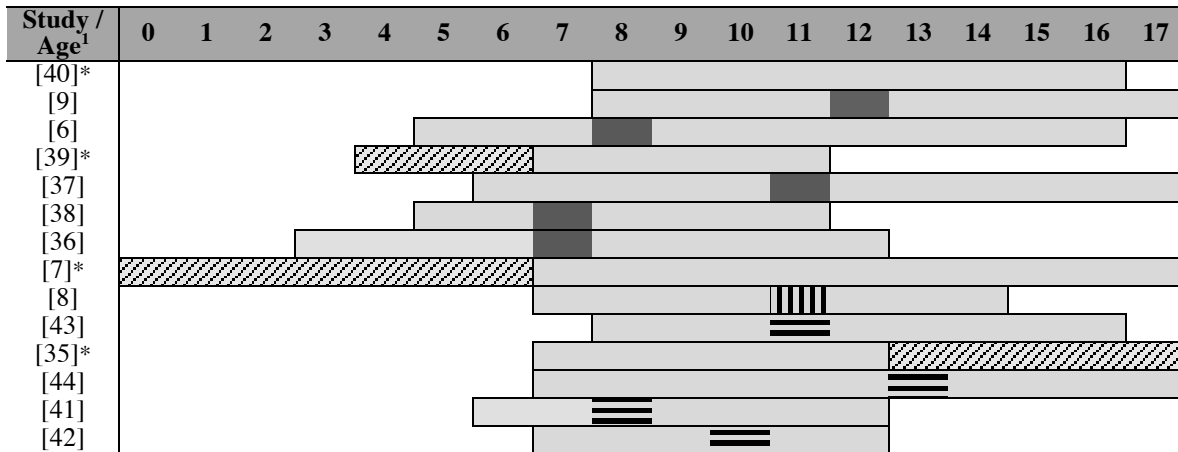

-  Age range of included study children
-  Age range of study children not included in this review
-  Calculated mean age of study children (comparison and intervention groups combined)
-  Empirical mean [mean - mode = 3(mean - median)] of the comparison and intervention group children
-  Mean age of children provided in the study paper (comparison and intervention groups combined)
- \* Mean age not reported and could not be calculated from study data provided

<sup>1</sup> years
